# Supplementary material for: Two-dimensional oxygen crystal with a honeycomb lattice on an ultraflat Cu(111)
Source: Research Square preprint supplement (doi:10.21203/rs.3.rs-4940255/v1), 2024-09-10
Supplement: Supplementary file 1 [file 99cb333a755dcf373b76fe0c.docx]

**Supplementary Materials of “Two-dimensional oxygen crystal with a honeycomb lattice on an ultraflat Cu(111)”**

Note 1: Theoretical analysis of magnetic multipoles in oxylene

Note 2: Theoretical analysis of symmetry-allowed linear responses in oxylene

**Note 1. Theoretical analysis of magnetic multipoles in oxylene**


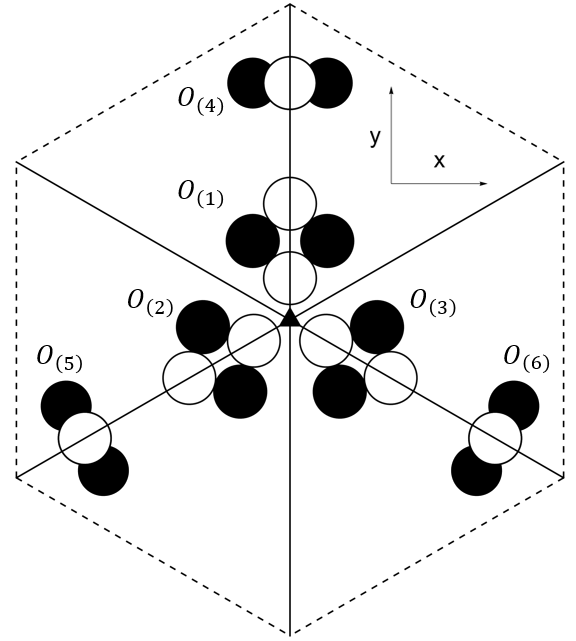


Figure S1. Spin densities of the upper oxygen layer in a unit cell of oxylene, projected onto the plane. Each oxygen atom has its own atomic multipole . Black and white circles represent spins, respectively, aligned along the quantization axis. Solid lines indicate the mirror planes normal to the plane. A triangle indicates the origin of the three-fold axis normal to the plane. For , , and , an additional white circle is located beneath each depicted white circle.

Since symmetry governs physical phenomena, it can be used to predict them. Specifically, physical phenomena can be systematically analyzed by reducing them to symmetry-invariant multipoles. In this section, we analyze the multipoles in oxylene, following the definitions of symbols and methods described in Refs. 1 and 2. We focus on the upper oxygen layer (Fig. S1) as it primarily responds to external stimuli from the top surface.

The atomic multipole of in Fig. S1 corresponds to the magnetic octupole because the spin has a spatial distribution of . The atomic multipoles of and are magnetic octupoles derived by rotating by 120 degrees and 240 degrees around the axis, respectively. As a result, and can be expressed as linear combinations of and : and .

The atomic multipoles of *, ,* and can be obtained similarly. The atomic multipole of corresponds to the magnetic octupole of because has a spatial distribution of . Note that . As the second term remains unaffected with rotation around the axis, and can be expressed as: and .

Since the unit cell of oxylene includes all of (= 1, …, 6) (Fig. S1), it is necessary to define a cluster multipole as the macroscopic order parameter that encompasses all six atomic multipoles:

where is , is , and is .

We note that the spatial distribution of (= 1, …, 6) is classified as the magnetic point group , where ‘3’ denotes three-fold rotation symmetry and denotes a combined symmetry of time-reversal symmetry and mirror symmetry relative to three mirror axes denoted by solid lines in Fig. S1. Within the symmetry group , and can be treated as and , respectively, since they undergo the same transformations for . On the other hand, functions as a scalar 1.

Therefore, of oxylene is given as:

,

where is the magnetic hexadecapole and is the magnetic octupole2. Considering the lowest order multipole, thus, of oxylene may be referred to as the cluster magnetic octupole. Note that of is indistinguishable from in , implying that, from a symmetry perspective, is equivalent to and behaves similarly to collinear ferromagnets or ferrimagents. In fact, according to the classification in the spin space group of collinear magnets3, we find that oxylene belongs to the type 1 phase, which includes both ferromagnet and ferrimagnet. As explained in the main text, the magnetization density at the hcp and fcc sites differs in magnitude, indicating that oxylene behaves like a ferrimagnet.

It is important to note that the noncollinear antiferromagnet Mn3Z (Z = Sn, Ge) also exhibits macroscopic cluster magnetic octupole order4. This macroscopic order parameter of Mn3Z is responsible for a range of effects, including the large anomalous Hall effect5,6, anomalous Nernst effect7,8, magneto-optical Kerr effect9,10, magnetic spin Hall effect11, and piezomagnetism12. Despite the difference in their magnetic point groups ( for oxylene and for Mn3Sn), the presence of cluster magnetic octupole in oxylene suggests that oxylene may exhibit similar linear responses to those observed in Mn3Z. In the next section, we analyze symmetry-allowed linear responses in oxylene.

**Note 2. Theoretical analysis of symmetry-allowed linear responses in oxylene**

In this section, we analyze symmetry-allowed linear responses in oxylene, following the definitions of symbols and methods described in Ref. 1. The linear response tensor can be represented as , where is the rank- response and is the rank- external field. When has the parity , it is called a polar (axial) tensor.

Symmetry-allowed linear responses satisfy two conditions. The first condition is that remains invariant under the rotation associated with the system’s symmetry. We define as the representation matrix of with the observable . In the rotated frame, the linear response equation becomes: . As a result, symmetry-allowed linear responses can be identified by verifying if the following equation is satisfied:

(S1)

The second condition considers time-reversal symmetry. To describe this condition, we use the Kubo formula13 for the linear response of under a perturbation Hamiltonian . Depending on the time-reversal property, is decomposed into and , where includes the intraband contribution and is the interband one1. When the antiunitary operation , where is the time-reversal operation, preserves the system’s symmetry, and are transformed as follows:

*,* (S2)

, (S3)

where for . When , () can be represented by a time-reversal odd (even) multipole, and vice versa. To satisfy the symmetry conditions [Eqs. (S2) and (S3)], should consist of active multipoles that are invariant under the symmetry operations of the magnetic point group corresponding to the system1.

The parityand time-reversal propertyclassify multipoles into four types: electric multipole , electric toroidal multipole , magnetic multipole , and magnetic toroidal multipole (Table S1)2. The above two conditions directly depend on and , making it natural to describe based on , , , and .

From now on, we show the symmetry-allowed linear responses for and in oxylene. The active multipoles required to determine for are listed in Table S21. includes the electric conductivity tensor, the magnetoelectric tensor, the magnetic susceptibility tensor, and the electric-field induced rotation. As shown in Table S3, can be classified based on and parity. According to the Wigner-Eckart theorem14, for can be represented as:

, (S4)

where , , and are defined in Table S4. Here, the row and column correspond to and , respectively.

As an example, let us consider the conductivity tensor where is the electrical current and is the electric field or temperature gradient. According to Table S4, this tensor corresponds to and is a polar tensor. When , of Eq. (S4) is , which corresponds to the magnetic dipole along direction. The presence of as off-diagonal components of indicates that oxylene exhibits the anomalous Hall effect, anomalous Nernst effect, and magneto-optical Kerr effect. As another example, let us consider the magnetoelectric tensor where is the magnetization and is the electric field. According to Table S4, this tensor corresponds to and is an axial tensor. When , and of Eq. (S4) are (magnetic monopole) and (magnetic quadrupole), respectively. This indicates that oxylene has the symmetry of and , enabling oxylene to exhibit the magnetoelectric effect.

Next, we discuss , which includes the piezoelectric tensor, the piezomagnetic tensor, and spin conductivity tensor (See Table S5). can be represented as:

, (S5)

where is independent of . The row corresponds to , and the column corresponds to .

As an example, let us consider the piezomagnetic tensor where is the magnetization and is the mechanical stress. According to Table S4, this tensor corresponds to and is an axial tensor. When , all terms of Eq. (S5) are . As a result, oxylene exhibits the piezomagnetic effect. Similarly, one can show that oxylene also exhibits the piezoelectric effect and the magnetic spin Hall effect by considering the relevant symmetry-allowed terms.

Table S1. Classification of rank- multipole according to parity and time-reversal property .

| Electric multipole | Electric toroidal  multipole | Magnetic multipole | Magnetic toroidal  multipole |
| --- | --- | --- | --- |
| ()=() | ()=() | ()=() | ()=() |

Table S2. Active multipoles in the magnetic point group up to third order. Here, is the monopole, and are the dipoles corresponding to , , and , respectively. is the quadrupole of , and , and are the octupoles of , , and , respectively.

|  |  |  |  |
| --- | --- | --- | --- |
|  |  |  |  |

Table S3. Classification of .

|  |  |  |
| --- | --- | --- |
| Polar tensor | Magnetic susceptibility tensor, | Electric conductivity tensor |
| Axial tensor | Electric-field induced rotation  Rotation-electric field induced electric dipole6 | Magnetoelectric tensor |

Table S4. Detailed information of .

|  | , | , |
| --- | --- | --- |
| Polar tensor |  |  |
| Axial tensor |  |  |

Table S5. Classification of .

|  |  |  |
| --- | --- | --- |
| Polar tensor | Piezoelectric tensor |  |
| Axial tensor | Spin conductivity tensor | Piezomagnetic tensor |

**References**

1. Yatsushiro, M., Kusunose, H. & Hayami, S. Multipole classification in 122 magnetic point groups for unified understanding of multiferroic responses and transport phenomena. *Phys. Rev. B* **104**, 054412 (2021).
2. Hayami, S., Yatsushiro, M., Yanagi, Y. & Kusunose, H. Classification of atomic-scale multipoles under crystallographic point groups and application to linear response tensors. *Phys. Rev. B* **98**, 165110 (2018).
3. Šmejkal, L., Sinova, J. & Jungwirth, T. Beyond conventional ferromagnetism and antiferromagnetism: a phase with nonrelativistic spin and crystal rotation symmetry. *Phys. Rev. X* **12**, 031042 (2022).
4. Suzuki, M.-T., Koretsune, T., Ochi, M. & Arita, R. Cluster multipole theory for anomalous Hall effect in antiferromagnets. *Phys. Rev. B* **95**, 094406 (2017).
5. Nakatsuji, S., Kiyohara, N. & Higo, T. Large anomalous Hall effect in a non-collinear antiferromagnet at room temperature. *Nature* **527**, 212 (2015).
6. Nayak, A. K. *et al.* Large anomalous Hall effect driven by a nonvanishing Berry curvature in the noncolinear antiferromagnet Mn3Ge. *Sci. Adv.* **2**, e1501870 (2016).
7. Ikhlas, M. *et al.* Large anomalous Nernst effect at room temperature in a chiral antiferromagnet. *Nat. Phys.* **13**, 1085 (2017).
8. Hong, D. *et al.* Large anomalous Nernst and inverse spin-Hall effects in epitaxial thin films of kagome semimetal Mn3Ge. *Phys. Rev. Mater.* **4**, 094201 (2020).
9. Higo, H. *et al.* Large magneto-optical Kerr effect and imaging of magnetic octupole domains in an antiferromagnetic metal. *Nat. Photon.* **12**, 73 (2018).
10. Wu, M. *et al.* Magneto-optical Kerr effect in a non-collinear antiferromagnet Mn3Ge. *Appl. Phys. Lett.* **116**, 132408 (2020).
11. Kimata, M. *et al.* Magnetic and magnetic inverse spin Hall effects in a non-collinear antiferromagnet. *Nature* **565**, 627 (2019).
12. Ikhlas, M. *et al.* Piezomagnetic switching of the anomalous Hall effect in an antiferromagnet at room temperature. *Nat. Phys.* **18**, 1086 (2022).
13. Kubo, R. Statistical-mechanical theory of irreversible processes. I. General theory and simple applications to magnetic and conduction problems. *J. Phys. Soc. Jpn.* **12**, 570-586 (1957).
14. Sakurai, J. J. Modern quantum mechanics (Massachusetts, 1994, Addison-Wesley).
15. Oiwa, R. & Kusunose, H. Rotation, Electric-field responses, and absolute enantioselection in chiral crystals. *Phys. Rev. Lett.* **129**, 116401 (2022).
